# Supplementary material for: Reassessing Ireland's Hottest Temperature Record
Source: Copernicus journal article supplement (doi:10.5194/cp-2021-139), 2021-11-01
Supplement: Supplementary file [file cp-2021-139-AC1-supplement.pdf]

## Reviewer 1

### General

This paper makes a well-argued case that the record Irish (Eire) temperature should be the record for Boora in 1976 and not Kilkenny in 1887. However, I have a significant suggestion that could make this finding either stronger or weaker, or just possibly, change the decision. This involves considering the evidence from the several Figures in the paper like Figure 4. Here 500mb heights are shown in addition to the very useful pressure at mean sea level (PMSL) maps. It would be considerably more useful to replace 500mb heights, difficult to interpret in the context of this paper and not made much of anyway, by a relatively low-level reanalysis temperature field that is unlikely to be corrupted by a bad surface air temperature observation. I come back to this in the specific comments below

The other main comment is that aspects of the presentation should be improved, particularly many of the remaining diagrams. Nevertheless, the text is generally well written. I recommend this paper be accepted subject to significant/major revision.

*We thank the reviewer for the time taken to review our manuscript and their very useful feedback and helpful suggestions. We respond to specific points as they arise below and will of course attempt to improve the aspects of the presentation mentioned above (and below).*

### Specific Comments

1. Lines 30- 62 of Introduction and/or Table 2. Somewhere about here it would be very useful to add the latitude, longitude and height location of Kilkenny Castle. In Table 2 it would add useful information to add these details for all the other stations shown – much as done in Table 3.

*Both will be added in our revisions. With regard to table 2- Lat, Long and height ASL will be added for those cases where the exact location is known.*

2. Figure 1. It is not so easy to see on a printed copy where Kilkenny Castle is located on either map. Perhaps an arrow and superimposed text of suitable size saying “Kilkenny Castle” could be added.

*Thanks. We will edit this figure to improve this aspect.*

3. Figure 2. The coloured dots would be easier to see if the green background was much lighter.

*Figure will be amended as requested. We agree this will improve presentation.*

4. Figure 3. This diagram is not very clear on a printed copy, mainly because of the grey background. This can be fixed by making the graph lines thicker. The key is odd: the heading should be “stations” not “variable” and Kilkenny has a coloured line in the key, even though there are no data for this date, except the single point highlighted in the text. On the left, the label should add “degrees” before “Celsius”. In the caption “air” should be added after “surface”.

*The figure will be revised as indicated and we thank the reviewer for these helpful recommendations.*

5. Figure 4 and similar Figures. This is my most important comment. On the main Climate of the Twentieth Century Reanalysis v3 NOAA web site atmospheric temperature analyses are available in ensemble mean form for 8 times of the day for each day until 2015. I strongly recommend that 500hPa height be replaced by an appropriate relatively low-level temperature (850hPa temperature or lower, as long as not significantly affected by station biases). This would be done (probably) for 1500 hours for each sub-diagram shown in Figure 4 and the similar figures. Ensemble mean PMSL would need to be plotted for the same time of day for consistency. This would add genuine new information about the relative likelihood of the hottest temperature extremes. This type of information could become an important part of the evidence for daily surface air temperature extremes more generally. As far as I can see, appropriate sub-daily maps can be easily plotted for such data using the on line facility at [https://www.psl.noaa.gov/data/20thC\\_Rean/](https://www.psl.noaa.gov/data/20thC_Rean/) . After 2015, similar data should be available from ERA5.

*We thank the reviewer for this recommendation, and we will integrate this into our revised manuscript.*

Figure 5. On a printed copy, the red circle is less clear on some sub-diagrams than it should be. These are good diagrams otherwise. It might be useful to add combined simultaneous differences for all stations in a sixth panel -currently blank.

*Thanks for checking and highlighting. We will make this addition to Fig 5.*

6. Figure 7. Where relevant, I have the same comments about the graphs as for Figure 3.  
*We will make this adjustment in the revised manuscript.*
7. Figure 10. Same comments about the red dots as for Figure 5.
8. *We will make this adjustment in the revised manuscript.*

#### Minor comments

1. At Line 241, Parker (1994) is missing from the Reference list.

*We will add, thank you for catching that.*
